# Supplementary material
Source: publisher figshare collection journal article supplement (https://gsapubs.figshare.com/ndownloader/files/22537133)
Supplement: Supplementary file 1 [file 22537133]

Chenglin Gong, Ronald J. Steel, Kun Qi, and Yingmin Wang, 2020, Deep-water channel morphologies, architectures, and population densities in relation to stacking trajectories and climate states: GSA Bulletin, <https://doi.org/10.1130/B35431.1>.

## Supplemental Material

**Table S1.** A tabulation of 50 turbidite channels (numbered red circles in Fig. 1) with lateral ( $L$ ), random ( $R$ ), and vertical ( $V$ ) channel-complex trajectories (measured as  $T_{se}$  = angles of channel pathways) and their relation to channel morphometric properties (reported as  $W$  = channel widths,  $T$  = channel thicknesses, and aspect ratios =  $W/T$ ) and architectures (represented by  $M_s$  = mobility number).

**Table S2.** A summary of 49 contourite channels (numbered white circles in Fig. 1) with oblique upslope channel-complex trajectories (measured as  $T_{se}$  = angles of channel pathways) and their relation to channel morphometric properties (reported as  $W$  = channel widths,  $T$  = channel thicknesses, and aspect ratios =  $W/T$ ) and architectures (represented by  $M_s$  = mobility number).

**Table S3.** A tabulation of 43 deep-water channels (numbered yellow circles in Fig. 1) with unidirectional channel-complex trajectories (measured as  $T_{se}$  = angles of channel pathways) and their relation to channel morphometric properties (reported as  $W$  = channel widths,  $T$  = channel thicknesses, and aspect ratios =  $W/T$ ) and architectures (represented by  $M_s$  = mobility number).

**Table S1.** A tabulation of 50 turbidite channels (numbered red circles in Fig. 1) with lateral ( $L$ ), random ( $R$ ), and vertical ( $V$ ) channel-complex trajectories (measured as  $T_{se}$  = angles of channel pathways) and their relation to channel morphometric properties (reported as  $W$  = channel widths,  $T$  = channel thicknesses, and aspect ratios =  $W/T$ ) and architectures (represented by  $M_s$  = mobility number). The listed channel examples are typically oriented parallel or subparallel to the direction of down-slope turbidity currents, and are generally interpreted to be created by down-slope turbidity currents (i.e., turbidite channels).

| Codes | Locations              | Examples or key references                   | Climate states                  |          | Morphologies |         |       | Architectures | Channel trajectories |        |
|-------|------------------------|----------------------------------------------|---------------------------------|----------|--------------|---------|-------|---------------|----------------------|--------|
|       |                        |                                              | Ages                            | Climates | $W$ (m)      | $T$ (m) | $W/T$ | $M_s$         | $T_{se}$ (°)         | Trends |
| TC1   | Yinggehai              | Unpublished seismic data (Li and Gong, 2016) | Pliocene                        | Icehouse | 814          | 59      | 12    | 1.89          | 2.2                  | $L$    |
| TC2   | Offshore Indonesia     | Figure 9B of Saller et al. 2012              | Late Quaternary                 | Icehouse | 602          | 195     | 3     | 0.25          | 52.7                 | $V$    |
| TC3   |                        | Figure 8A of Saller et al. 2004              | Late Quaternary                 | Icehouse | 768          | 200     | 4     | 0.52          | 26.5                 | $V$    |
| TC4   | Eastern Borneo Margin  | Figure 2A of Posamentie and Kolla (2003)     | Late Quaternary                 | Icehouse | 1626         | 130     | 12    | 1.21          | 3.8                  | $L$    |
| TC5   | Austrian Molasse basin | Figure 14 of Hubbard et al. 2009             | Late Oligocene to early Miocene | Icehouse | 3937         | 196     | 20    | 0.76          | 3.7                  | $L$    |
| TC6   |                        |                                              |                                 | Icehouse | 3804         | 196     | 19    | 1.12          | 2.6                  | $L$    |
| TC7   |                        |                                              |                                 | Icehouse | 3814         | 159     | 24    | 0.79          | 3.0                  | $L$    |
| TC8   | Bengal Fan (Zhang      | Unpublished seismic data                     | Pliocene                        | Icehouse | 786          | 127     | 6     | 0.36          | 24.3                 | $V$    |

|      |                                                |                                       |                 |          |      |     |    |      |      |          |
|------|------------------------------------------------|---------------------------------------|-----------------|----------|------|-----|----|------|------|----------|
| TC9  | et al., 2017)                                  | Unpublished seismic data              |                 | Icehouse | 1450 | 299 | 5  | 0.47 | 23.6 | <i>V</i> |
| TC10 |                                                | Figure 7B                             | Pliocene        | Icehouse | 1849 | 280 | 7  | 0.64 | 13.3 | <i>V</i> |
| TC11 | Channel T1 in the<br>Indus Fan, Arabian<br>Sea | Figure 2A of Deptuck et al.<br>2003   | Late Quaternary | Icehouse | 954  | 225 | 4  | 0.45 | 27.9 | <i>V</i> |
| TC12 |                                                |                                       |                 | Icehouse | 994  | 270 | 4  | 0.71 | 21.0 | <i>V</i> |
| TC13 |                                                |                                       |                 | Icehouse | 3589 | 177 | 20 | 0.69 | 4.1  | <i>R</i> |
| TC14 |                                                |                                       |                 | Icehouse | 3698 | 97  | 38 | 0.96 | 1.6  | <i>L</i> |
| TC15 | Channel T2 in the<br>Indus Fan, Arabian<br>Sea | Figure 3A of Deptuck et al.<br>2003   | Late Quaternary | Icehouse | 1970 | 296 | 7  | 0.12 | 50.8 | <i>V</i> |
| TC16 |                                                |                                       |                 | Icehouse | 1256 | 275 | 5  | 0.13 | 59.0 | <i>V</i> |
| TC17 |                                                |                                       |                 | Icehouse | 3516 | 187 | 19 | 0.60 | 5.1  | <i>R</i> |
| TC18 |                                                |                                       |                 | Icehouse | 3960 | 99  | 48 | 0.88 | 1.6  | <i>L</i> |
| TC19 | Channel T3 in the<br>Indus Fan, Arabian<br>Sea | Figure 6D of Sylvester et al.<br>2011 | Late Quaternary | Icehouse | 1314 | 141 | 9  | 0.29 | 20.1 | <i>V</i> |
| TC20 |                                                |                                       |                 | Icehouse | 867  | 200 | 4  | 0.86 | 15.1 | <i>V</i> |
| TC21 |                                                |                                       |                 | Icehouse | 1802 | 62  | 29 | 1.19 | 1.7  | <i>L</i> |
| TC22 |                                                |                                       |                 | Icehouse | 945  | 130 | 7  | 0.65 | 12.0 | <i>V</i> |
| TC23 |                                                |                                       |                 | Icehouse | 1923 | 152 | 13 | 1.11 | 4.1  | <i>L</i> |
| TC24 | Channel T3 in the<br>Indus Fan, Arabian<br>Sea | Figure 6D of Sylvester et al.<br>2011 | Late Quaternary | Icehouse | 892  | 227 | 4  | 0.60 | 22.9 | <i>V</i> |
| TC25 |                                                |                                       |                 | Icehouse | 2343 | 113 | 21 | 1.11 | 2.5  | <i>R</i> |
| TC26 |                                                |                                       |                 | Icehouse | 1560 | 64  | 24 | 1.06 | 2.2  | <i>L</i> |

|      |                                                |                                        |                |          |      |     |    |      |      |          |
|------|------------------------------------------------|----------------------------------------|----------------|----------|------|-----|----|------|------|----------|
| TC27 |                                                |                                        |                | Icehouse | 3992 | 95  | 42 | 0.97 | 1.4  | <i>L</i> |
| TC28 |                                                |                                        |                | Icehouse | 834  | 85  | 10 | 1.81 | 3.2  | <i>R</i> |
| TC29 | Offshore Angola                                | Figure 2 of Abreu et al. 2003          | N/A            | N/A      | 623  | 100 | 6  | 0.59 | 15.3 | <i>V</i> |
| TC30 |                                                |                                        |                | N/A      | 825  | 72  | 11 | 0.85 | 5.9  | <i>R</i> |
| TC31 |                                                |                                        |                | N/A      | 404  | 26  | 15 | 1.41 | 2.6  | <i>L</i> |
| TC32 | West Africa margin                             | Figure 17 of Janocko et al. (2013)     | Quaternary     | Icehouse | 2126 | 106 | 20 | 1.21 | 2.4  | <i>R</i> |
| TC33 |                                                |                                        |                | Icehouse | 712  | 33  | 22 | 1.35 | 1.9  | <i>L</i> |
| TC34 |                                                |                                        |                | Icehouse | 399  | 101 | 4  | 0.49 | 27.5 | <i>V</i> |
| TC35 | Zaire turbidite fan                            | Figure 8 of Labourdette and Bez (2009) | Late Oligocene | Icehouse | 633  | 38  | 17 | 1.64 | 2.1  | <i>L</i> |
| TC36 | Benin channel,<br>western Niger Delta<br>slope | Figure 8 of Labourdette and Bez (2009) | Quaternary     | Icehouse | 435  | 85  | 5  | 0.22 | 42.0 | <i>V</i> |
| TC37 |                                                |                                        |                | Icehouse | 732  | 108 | 7  | 0.19 | 37.2 | <i>V</i> |
| TC38 | Benin channel,<br>western Niger Delta<br>slope | Figure 7A of Deptuck et al. (2007)     | Quaternary     | Icehouse | 667  | 108 | 6  | 0.11 | 56.8 | <i>V</i> |
| TC39 |                                                |                                        |                | Icehouse | 501  | 108 | 5  | 0.79 | 15.2 | <i>V</i> |
| TC40 |                                                |                                        |                | Icehouse | 2121 | 88  | 24 | 1.32 | 1.8  | <i>R</i> |
| TC41 |                                                |                                        |                | Icehouse | 1785 | 42  | 42 | 0.95 | 1.4  | <i>L</i> |
| TC42 | Benin-major<br>channel, western                | Figure 5A of Deptuck et al.            | Quaternary     | Icehouse | 641  | 291 | 2  | 0.31 | 55.8 | <i>V</i> |
| TC43 |                                                |                                        |                | Icehouse | 1688 | 126 | 13 | 1.56 | 2.7  | <i>R</i> |

|      |                   |                                      |                 |          |      |     |    |      |      |          |
|------|-------------------|--------------------------------------|-----------------|----------|------|-----|----|------|------|----------|
| TC44 | Niger Delta slope | (2012)                               |                 | Icehouse | 3515 | 165 | 21 | 1.73 | 1.6  | <i>L</i> |
| TC45 | West Nile Delta   | Figure 4A of Cross et al. (2009)     | Pliocene        | Icehouse | 3384 | 149 | 23 | 1.37 | 1.8  | <i>R</i> |
| TC46 | Joshua channels,  | Figure 4                             | Late Quaternary | Icehouse | 1342 | 121 | 11 | 1.50 | 3.4  | <i>L</i> |
| TC47 | Gulf of Mexico    |                                      |                 | Icehouse | 862  | 294 | 3  | 0.47 | 36.1 | <i>V</i> |
| TC48 | Offshore Colombia | Figure 10 of Stevenson et al. (2015) | Late Quaternary | Icehouse | 555  | 113 | 5  | 0.76 | 14.9 | <i>V</i> |
| TC49 |                   |                                      |                 | Icehouse | 1071 | 125 | 9  | 0.23 | 26.9 | <i>V</i> |
| TC50 | Amazon fan        | Figure 16 of Pirmez and Flood (2003) | Late Quaternary | Icehouse | 1666 | 290 | 6  | 0.45 | 21.3 | <i>V</i> |

**Table S2.** A summary of 49 contourite channels (numbered white circles in Fig. 1) with oblique upslope channel-complex trajectories (measured as  $T_{se}$  = angles of channel pathways) and their relation to channel morphometric properties (reported as  $W$  = channel widths,  $T$  = channel thicknesses, and aspect ratios =  $W/T$ ) and architectures (represented by  $M_s$  = mobility number). The tabulated channel examples are typically oriented subparallel to the direction of along-slope contour currents, and are commonly considered to be created by along-slope contour currents (i.e., contourite channels).

| Codes | Locations                | Examples or key references          | Climate states    |          | Morphologies |         |       | Architectures | Channel trajectories |                |
|-------|--------------------------|-------------------------------------|-------------------|----------|--------------|---------|-------|---------------|----------------------|----------------|
|       |                          |                                     | Ages              | Climates | $W$ (m)      | $T$ (m) | $W/T$ | $M_s$         | $T_{se}$ (°)         | Trends         |
| C1    | Sakhalin Basin<br>Russia | Figure 8A of Henriksen et al. -2008 | Miocene to recent | Icehouse | 3447         | 59      | 17    | 0.83          | -88.8                | <i>Upslope</i> |
| C2    |                          |                                     |                   | Icehouse | 2562         | 45      | 23    | 0.69          | -88.5                | <i>Upslope</i> |
| C3    |                          |                                     |                   | Icehouse | 2402         | 42      | 14    | 0.43          | -87.6                | <i>Upslope</i> |
| C4    |                          |                                     |                   | Icehouse | 2404         | 48      | 20    | 0.66          | -88.3                | <i>Upslope</i> |
| C5    |                          |                                     |                   | Icehouse | 2282         | 38      | 18    | 0.50          | -88.1                | <i>Upslope</i> |
| C6    |                          |                                     |                   | Icehouse | 2383         | 36      | 17    | 0.61          | -88.6                | <i>Upslope</i> |
| C7    |                          |                                     |                   | Icehouse | 1598         | 47      | 21    | 0.32          | -84.7                | <i>Upslope</i> |
| C8    |                          |                                     |                   | Icehouse | 1355         | 37      | 12    | 0.71          | -87.8                | <i>Upslope</i> |
| C9    |                          |                                     |                   | Icehouse | 2171         | 51      | 9     | 0.80          | -88.3                | <i>Upslope</i> |
| C10   |                          |                                     |                   | Icehouse | 3382         | 69      | 36    | 0.87          | -88.7                | <i>Upslope</i> |
| C11   | North Okhotsk margin     | Figure 8A of Wong et al. 2003       | Quaternary        | Icehouse | 2139         | 60      | 27    | 1.20          | -88.7                | <i>Upslope</i> |
| C12   | Qiongdongnan slope       | Wild and Posamentier (2012)         | Middle Miocene    | Icehouse | 3050         | 119     | 30    | 0.08          | -62.9                | <i>Upslope</i> |
| C13   |                          |                                     |                   | Icehouse | 2664         | 119     | 31    | 0.08          | -60.8                | <i>Upslope</i> |
| C14   |                          |                                     |                   | Icehouse | 1831         | 76      | 22    | 0.06          | -57.4                | <i>Upslope</i> |
| C15   |                          |                                     |                   | Icehouse | 3016         | 127     | 26    | 0.04          | -44.9                | <i>Upslope</i> |
| C16   | Southern Qiongdongnan    | Figure 6A of Gong et al. (2017)     | Recent            | Icehouse | 4778         | 178     | 20    | 0.29          | -82.7                | <i>Upslope</i> |

|     |                                                  |                                     |                  |            |      |     |    |      |       |                |
|-----|--------------------------------------------------|-------------------------------------|------------------|------------|------|-----|----|------|-------|----------------|
| C17 | Faeroe-Shetland margin                           | Figure 8A                           | Late Neogene     | Icehouse   | 4640 | 74  | 23 | 0.16 | -84.4 | <i>Upslope</i> |
| C18 |                                                  |                                     |                  | Icehouse   | 4567 | 70  | 29 | 0.62 | -88.6 | <i>Upslope</i> |
| C19 |                                                  |                                     |                  | Icehouse   | 1565 | 25  | 19 | 0.36 | -87.4 | <i>Upslope</i> |
| C20 | Faeroe-Shetland margin                           | Figure 8A                           | Late Neogene     | Icehouse   | 3870 | 59  | 22 | 0.24 | -86.3 | <i>Upslope</i> |
| C21 | West Shetland                                    | Figure 13 of Knutz, 2008            | Plio-Pleistocene | Icehouse   | 865  | 51  | 27 | 0.11 | -62.4 | <i>Upslope</i> |
| C22 | West Shetland                                    |                                     |                  | Icehouse   | 993  | 38  | 43 | 0.16 | -76.5 | <i>Upslope</i> |
| C23 | West Shetland                                    |                                     |                  | Icehouse   | 1340 | 33  | 13 | 0.17 | -81.7 | <i>Upslope</i> |
| C24 | West Shetland                                    |                                     |                  | Icehouse   | 827  | 42  | 16 | 0.16 | -72.8 | <i>Upslope</i> |
| C25 | West Shetland                                    |                                     |                  | Icehouse   | 2010 | 75  | 15 | 0.07 | -63.4 | <i>Upslope</i> |
| C26 | Northern Tyrrhenian                              | Figure 8 of Miramontes -2016        | Quaternary       | Icehouse   | 442  | 31  | 20 | 0.15 | -65.9 | <i>Upslope</i> |
| C27 | Algarve Cabral contourite channel, Gulf of Cadiz | Figure 10 of Hernández-Molina -2016 | Early Pliocene   | Icehouse   | 3516 | 127 | 13 | 0.16 | -77.6 | <i>Upslope</i> |
| C28 |                                                  |                                     |                  | Icehouse   | 2772 | 78  | 12 | 0.64 | -87.5 | <i>Upslope</i> |
| C29 |                                                  |                                     |                  | Icehouse   | 2904 | 46  | 13 | 0.68 | -88.7 | <i>Upslope</i> |
| C30 |                                                  |                                     |                  | Icehouse   | 3413 | 55  | 10 | 0.13 | -82.8 | <i>Upslope</i> |
| C31 | North Sea Basin                                  | Figure 2A of Knutz -2008            | Pliocene         | Icehouse   | 895  | 28  | 10 | 0.09 | -71.8 | <i>Upslope</i> |
| C32 |                                                  |                                     |                  | Icehouse   | 993  | 25  | 10 | 0.04 | -57.0 | <i>Upslope</i> |
| C33 |                                                  |                                     |                  | Icehouse   | 1697 | 41  | 11 | 0.05 | -62.3 | <i>Upslope</i> |
| C34 |                                                  |                                     |                  | Icehouse   | 1650 | 40  | 45 | 0.02 | -42.4 | <i>Upslope</i> |
| C35 |                                                  |                                     |                  | Icehouse   | 1380 | 25  | 14 | 0.02 | -45.3 | <i>Upslope</i> |
| C36 |                                                  |                                     |                  | Icehouse   | 1389 | 21  | 13 | 0.02 | -55.3 | <i>Upslope</i> |
| C37 |                                                  |                                     |                  | Icehouse   | 1986 | 42  | 24 | 0.02 | -40.2 | <i>Upslope</i> |
| C38 | German North Sea                                 | Figure 7 of Surlyk et al. -2008     | Late Cretaceous  | Greenhouse | 1457 | 70  | 25 | 0.05 | -46.7 | <i>Upslope</i> |
| C39 | German North Sea                                 |                                     |                  | Greenhouse | 2343 | 98  | 26 | 0.05 | -48.9 | <i>Upslope</i> |
| C40 | German North Sea                                 |                                     |                  | Greenhouse | 4186 | 105 | 27 | 0.07 | -70.8 | <i>Upslope</i> |
| C41 | Southern Scotia Sea                              | Figure 7 of Pérez et al. -2014      | Quaternary       | Icehouse   | 2601 | 46  | 32 | 0.03 | -62.1 | <i>Upslope</i> |
| C42 | Southern Scotia Sea                              |                                     |                  | Icehouse   | 681  | 37  | 26 | 0.24 | -77.4 | <i>Upslope</i> |

|     |                           |           |                          |          |      |     |    |      |       |                |
|-----|---------------------------|-----------|--------------------------|----------|------|-----|----|------|-------|----------------|
| C43 | Santos Basin              | Figure 9B | Early Miocene            | Icehouse | 430  | 23  | 8  | 0.14 | -69.1 | <i>Upslope</i> |
| C44 | Santos Basin              |           |                          | Icehouse | 814  | 34  | 17 | 0.26 | -80.9 | <i>Upslope</i> |
| C45 | Offshore Canterbury Basin | Figure 8B | Late Miocene to Pliocene | Icehouse | 1279 | 56  | 23 | 0.55 | -85.4 | <i>Upslope</i> |
| C46 | Offshore Canterbury Basin | Figure 8B | Late Miocene to Pliocene | Icehouse | 1081 | 29  | 14 | 0.17 | -81.3 | <i>Upslope</i> |
| C47 |                           |           |                          | Icehouse | 1998 | 138 | 20 | 0.06 | -72.6 | <i>Upslope</i> |
| C48 |                           |           |                          | Icehouse | 1230 | 62  | 18 | 0.04 | -89.8 | <i>Upslope</i> |
| C49 |                           |           |                          | Icehouse | 1993 | 75  | 17 | 0.03 | -89.8 | <i>Upslope</i> |



**Table S3.** A tabulation of 43 deep-water channels (numbered yellow circles in [Fig. 1](#)) with unidirectional channel-complex trajectories (measured as  $T_{se}$  = angles of channel pathways) and their relation to channel morphometric properties (reported as  $W$  = channel widths,  $T$  = channel thicknesses, and aspect ratios =  $W/T$ ) and architectures (represented by  $M_s$  = mobility number). The listed channel examples are typically oriented parallel or subparallel to the direction of down-slope turbidity currents, but consistently migrate in an along-slope direction, and are generally interpreted to be created by the interplay of turbidity and contour currents (i.e., unidirectionally migrating deep-water channels).

| Codes | Locations                 | Examples or key references       | Climate states    |          | Channel morphologies |         |       | Architectures | Channel trajectories |                   |
|-------|---------------------------|----------------------------------|-------------------|----------|----------------------|---------|-------|---------------|----------------------|-------------------|
|       |                           |                                  | Ages              | Climates | $W$ (m)              | $T$ (m) | $W/T$ | $M_s$         | $T_{se}$ (°)         | Trends            |
| UC1   | Pearl River mouth slope   | U1 on <a href="#">Figure 9B</a>  | Miocene to recent | Icehouse | 3151                 | 186     | 59    | 0.23          | 14.2                 | <i>Alongslope</i> |
| UC2   |                           | U2 on <a href="#">Figure 9B</a>  |                   | Icehouse | 4217                 | 183     | 57    | 0.23          | 10.8                 | <i>Alongslope</i> |
| UC3   |                           | U3 on <a href="#">Figure 9B</a>  |                   | Icehouse | 3580                 | 251     | 57    | 0.35          | 11.3                 | <i>Alongslope</i> |
| UC4   |                           | U4 on <a href="#">Figure 9B</a>  |                   | Icehouse | 4528                 | 226     | 50    | 0.27          | 10.6                 | <i>Alongslope</i> |
| UC5   |                           | U5 on <a href="#">Figure 9B</a>  |                   | Icehouse | 4571                 | 248     | 60    | 0.31          | 9.9                  | <i>Alongslope</i> |
| UC6   |                           | U6 on <a href="#">Figure 9B</a>  |                   | Icehouse | 2769                 | 165     | 66    | 0.28          | 11.8                 | <i>Alongslope</i> |
| UC7   |                           | U7 on <a href="#">Figure 9B</a>  |                   | Icehouse | 4382                 | 214     | 34    | 0.32          | 8.8                  | <i>Alongslope</i> |
| UC8   | Western Pearl River slope | U1 on <a href="#">Figure 11A</a> | Pliocene          | Icehouse | 2723                 | 228     | 37    | 0.62          | 7.7                  | <i>Alongslope</i> |
| UC9   | Western Pearl River slope | U2 on <a href="#">Figure 11A</a> |                   | Icehouse | 1479                 | 165     | 42    | 0.34          | 18.0                 | <i>Alongslope</i> |

|      |                             |                                                    |                        |            |      |    |    |      |      |                   |
|------|-----------------------------|----------------------------------------------------|------------------------|------------|------|----|----|------|------|-------------------|
| UC10 | Eastern Qiongdongnan margin | U1 on <a href="#">Figure 11B</a>                   | Late Miocene           | Icehouse   | 1649 | 46 | 49 | 0.24 | 6.6  | <i>Alongslope</i> |
| UC11 |                             | U2 on <a href="#">Figure 11B</a>                   |                        | Icehouse   | 1528 | 57 | 36 | 0.37 | 5.7  | <i>Alongslope</i> |
| UC12 |                             | U3 on <a href="#">Figure 11B</a>                   |                        | Icehouse   | 1481 | 50 | 26 | 0.33 | 5.8  | <i>Alongslope</i> |
| UC13 | Eastern Qiongdongnan margin | U4 on <a href="#">Figure 11B</a>                   | Late Miocene           | Icehouse   | 2013 | 65 | 22 | 0.36 | 5.1  | <i>Alongslope</i> |
| UC14 |                             | U5 on <a href="#">Figure 11B</a>                   |                        | Icehouse   | 1180 | 53 | 24 | 0.37 | 6.9  | <i>Alongslope</i> |
| UC15 |                             | U6 on <a href="#">Figure 11B</a>                   |                        | Icehouse   | 1247 | 48 | 24 | 0.39 | 5.7  | <i>Alongslope</i> |
| UC16 |                             | U7 on <a href="#">Figure 11B</a>                   |                        | Icehouse   | 1394 | 69 | 27 | 0.46 | 6.1  | <i>Alongslope</i> |
| UC17 |                             | U8 on <a href="#">Figure 11B</a>                   |                        | Icehouse   | 1769 | 77 | 62 | 0.49 | 5.1  | <i>Alongslope</i> |
| UC18 |                             | U9 on <a href="#">Figure 11B</a>                   |                        | Icehouse   | 1776 | 61 | 65 | 0.31 | 6.3  | <i>Alongslope</i> |
| UC19 | North Carnarvon Basin       | <a href="#">Figure 12B</a> of Cathro et al. (2003) | Middle to late Miocene | Icehouse   | 556  | 29 | 61 | 0.06 | 39.8 | <i>Alongslope</i> |
| UC20 |                             |                                                    |                        | Icehouse   | 536  | 24 | 66 | 0.23 | 11.2 | <i>Alongslope</i> |
| UC21 |                             |                                                    |                        | Icehouse   | 951  | 35 | 17 | 0.23 | 9.2  | <i>Alongslope</i> |
| UC22 |                             |                                                    |                        | Icehouse   | 1022 | 24 | 26 | 0.13 | 10.0 | <i>Alongslope</i> |
| UC23 | North Mozambique            | <a href="#">Figure 2</a> of Palermo et al. (2014)  | Early Eocene           | Greenhouse | 710  | 54 | 40 | 0.10 | 37.0 | <i>Alongslope</i> |
| UC24 |                             |                                                    |                        | Greenhouse | 586  | 58 | 20 | 0.15 | 32.7 | <i>Alongslope</i> |
| UC25 |                             |                                                    |                        | Greenhouse | 434  | 46 | 27 | 0.20 | 27.2 | <i>Alongslope</i> |
| UC26 |                             |                                                    |                        | Greenhouse | 541  | 55 | 14 | 0.12 | 40.7 | <i>Alongslope</i> |
| UC27 |                             |                                                    |                        | Greenhouse | 454  | 43 | 28 | 0.10 | 44.4 | <i>Alongslope</i> |

|      |                        |                                          |                   |            |      |     |    |      |      |                   |
|------|------------------------|------------------------------------------|-------------------|------------|------|-----|----|------|------|-------------------|
| UC28 |                        |                                          |                   | Greenhouse | 3351 | 142 | 36 | 0.22 | 11.0 | <i>Alongslope</i> |
| UC29 | Offshore Gabon         | Figure 12A of Lonergan et al. (2013)     | Late Quaternary   | Icehouse   | 2624 | 105 | 63 | 0.17 | 13.4 | <i>Alongslope</i> |
| UC30 |                        |                                          |                   | Icehouse   | 3572 | 139 | 62 | 0.12 | 18.2 | <i>Alongslope</i> |
| UC31 | Offshore Gabon         | Figure 12A of Lonergan et al. (2013)     | Late Quaternary   | Icehouse   | 2465 | 90  | 33 | 0.14 | 14.8 | <i>Alongslope</i> |
| UC32 | Offshore Gabon         |                                          |                   | Icehouse   | 3066 | 97  | 40 | 0.34 | 5.4  | <i>Alongslope</i> |
| UC33 | Offshore Gabon         |                                          |                   | Icehouse   | 2495 | 97  | 41 | 0.36 | 6.2  | <i>Alongslope</i> |
| UC34 | Lower Congo Basin      | Figure 10B                               | Oligocene         | Greenhouse | 1998 | 245 | 42 | 0.39 | 17.4 | <i>Alongslope</i> |
| UC35 | Lower Congo Basin      |                                          |                   | Greenhouse | 1289 | 97  | 55 | 0.59 | 7.3  | <i>Alongslope</i> |
| UC36 | Lower Congo Basin      |                                          |                   | Greenhouse | 1525 | 98  | 67 | 0.69 | 5.3  | <i>Alongslope</i> |
| UC37 | Ebro margin            | Figure 4B of Kertznus and Kneller (2009) | Pleistocene       | Icehouse   | 614  | 41  | 47 | 0.60 | 6.4  | <i>Alongslope</i> |
| UC38 |                        |                                          |                   | Icehouse   | 712  | 36  | 8  | 0.54 | 5.3  | <i>Alongslope</i> |
| UC39 |                        |                                          |                   | Icehouse   | 793  | 60  | 20 | 0.79 | 5.5  | <i>Alongslope</i> |
| UC40 |                        |                                          |                   | Icehouse   | 1446 | 121 | 32 | 0.41 | 11.7 | <i>Alongslope</i> |
| UC41 | South Greenland margin | Figure 12A                               | Miocene to recent | Icehouse   | 3040 | 106 | 21 | 0.11 | 16.9 | <i>Alongslope</i> |
| UC42 |                        | Figure 12B                               |                   | Icehouse   | 1790 | 129 | 24 | 0.33 | 12.3 | <i>Alongslope</i> |
| UC43 | South Brazilian margin | Figure 12C                               | Quaternary        | Icehouse   | 1401 | 110 | 40 | 0.14 | 29.5 | <i>Alongslope</i> |

## References

- Abreu, V., Sullivan, M., Pirmez, C., Mohrig, C., 2003. Lateral accretion packages (LAPs): an important reservoir element in deep water sinuous channels. *Marine and Petroleum Geology* 20, 631–648.
- Cathro, D.L., Austin Jr., J.A., Moss, G.D., 2003. Progradation along a deeply submerged Oligocene–Miocene heterozoan carbonate shelf: How sensitive are clinoforms to sea level variations? *AAPG Bulletin* 87, 1547–1574.
- Cross, N.E., Cunningham, A., Cook, R.J., Taha, A., Esmatie, E., Swidan, N.E., 2009. Three-dimensional seismic geomorphology of a deep-water slope-channel system: The Sequoia field, offshore west Nile Delta, Egypt. *AAPG Bulletin* 93 (8), 1063–1086.
- Davies, R., Cartwright, J., Pike, J., Line, C., 2001. Early Oligocene initiation of North Atlantic Deep Water formation. *Nature* 410, 917–920.
- Deptuck, M.E., Steffens, G.S., Barton, M., Pirmez, C., 2003. Architecture and evolution of upper fan channel-belts on the Niger Delta slope and in the Arabian Sea. *Marine and Petroleum Geology* 20, 649–676.
- Deptuck, M.E., Sylvester, Z., Pirmez, C., O’Byrne, C., 2007. Migration-aggradation history and 3-D seismic geomorphology of submarine channels in the Pleistocene Benin-major Canyon, western Niger Delta slope. *Marine and Petroleum Geology* 23, 406–433.
- Deptuck, M.E., Kendell, K., Brown, D.E., Smith, B.M., 2012. Seismic stratigraphic framework and structural evolution of the eastern Scotian Slope: geological context for the NS14-1 Call for Bids area, offshore Nova Scotia. *CNSOPB Geoscience Open File Report*, 2014-001MF 1–58 pp.
- Gong, C., Peakall J., Wang, Y., Wells, M.G., Xu, J., 2017. Flow processes and sedimentation in contourite channels on the northwestern South China Sea margin: A joint 3D seismic and oceanographic perspective. *Marine Geology* 393, 176–193.
- Henriksen, S., Pontén, A., Janbu, N., Paasch, B., 2011. The importance of sediment supply and sequence-stacking pattern in creating hyperpycnal flows. In: Slatt, R.M., Zavala, C. (Eds.), *Sediment Transfer from Shelf to Deep Water—Revisiting the Delivery System*. AAPG Studies in Geology 61, pp. 129–152.
- Hernández-Molina, F.J., Sierro, F.J., Llave, E., Roque, C., Stow, D.A.V., Williams, T., Lofi, J., Van der Schee, M., Arnáiz, A., Ledesma, S., Rosales, C., Rodríguez-Tovar, F.J., Pardo-Igúzquiza, E., Brackenridge, R.E., 2016. Evolution of the gulf of Cadiz margin and southwest Portugal contourite depositional system: Tectonic, sedimentary and paleoceanographic implications from IODP expedition 339. *Marine Geology* 377, 7–39.
- Hubbard, S.M., de Ruig, M.J., Graham, S.A., 2009. Confined channel-levee complex development in an elongate depo-center: Deep-water Tertiary strata of the Austrian Molasse basin. *Marine and Petroleum Geology* 26, 85–112.
- Janocko, M., Nemec, W., Henriksen, S. and Warchol, M., 2013. The diversity of deep-water sinuous channel belts and slope valley-fill complexes. *Marine and Petroleum Geology* 41, 7–34.
- Kertzus, V. and Kneller, B., 2009. Clinoform quantification for assessing the effects of external forcing on continental margin development. *Basin Research* 21, 738–758.
- Knutz, P.C., 2008. Paleocceanographic significance of contourite drifts. In: Rebesco, M., Camerlenghi, A. (Eds.), *Contourites. Developments in Sedimentology*, 60. Elsevier, Amsterdam, pp. 511–535.
- Knutz, P.C., 2010. 3D seismic imaging of aggradational channels related to geostrophic currents through the Pliocene North Sea basin. *Geo-Temas* 11, 89–90.
- Labourdette, R., Bez, M., 2009. Element migration in turbidite systems: Random or systematic depositional processes? *AAPG Bulletin* 94, 345–368.
- Li, S., Gong, C., 2016. Flow dynamics and sedimentation of lateral accretion packages in sinuous deep-water

- channels: A 3D seismic case study from the northwestern South China Sea margin. *Journal of Asian Earth Sciences* 124, 233–246
- Loneragan, L., Huda Jamin, N., Jackson, C.A.-L., Johnson, H.D., 2013. U-shaped slope gully systems and sediment waves on the passive margin of Gabon (West Africa). *Marine Geology* 337, 80–97.
- Lu, H., Fulthorpe, C.S., Mann, P., 2003. Three-dimensional architecture of shelf-building sediment drifts in the offshore Canterbury Basin, New Zealand. *Marine Geology* 193, 19–47.
- Miramontes, E., Cattaneo, A., Jouet, G., Théréau, E., Thomas, Y., Rovere, M., Cauquil, E., Trincardi, F., 2016. The Pianosa Contourite Depositional System (Northern Tyrrhenian Sea): Drift morphology and Plio-Quaternary stratigraphic evolution. *Marine Geology* 378, 20–42.
- Pérez, L.F., Maldonado, A., Bohoyo, F., Hernández-Molina, F.J., Vázquez, J.T., Lobo, F.J., Martos, Y., 2014. Depositional processes and growth patterns of isolated oceanic basins: the Protector and Pirie basins of the Southern Scotia Sea (Antarctica). *Marine Geology* 357, 161–181.
- Palermo, D., Galbiati, M., Famiglietti, M., Marchesini, M., Mezzapesa, D., Fonnesu, F., 2014. Insights into a New Super-Giant Gas Field - Sedimentology and Reservoir Modeling of the Coral Complex, Offshore Northern Mozambique. OTC-24907-MS
- Pirmez, C., Flood, R.D., 1995. Morphology and structure of Amazon channel. In: Flood, R.D., Piper, D.J.W., Klaus, A. (Eds.), *Proceedings of the Ocean Drilling Program, Initial Reports*, 155, pp. 23–45.
- Posamentier, H.W., Kolla, V., 2003. Seismic geomorphology and stratigraphy of depositional elements in deep-water settings. *Journal of Sedimentary Research* 73, 367–388.
- Posamentier, H.W., 2003. Depositional elements associated with a basin floor channel-levee system: case study from the Gulf of Mexico. *Marine and Petroleum Geology* 20, 677–690.
- Saller, A., Dharmasamadhi, I.N.W., 2012. Controls on the development of valleys, canyons, and unconfined channel-levee complexes on the Pleistocene Slope of East Kalimantan, Indonesia. *Marine and Petroleum Geology* 29, 15–34.
- Saller, A.H., Noah, J.T., Ruzuar, A.P., Schneider, R., 2004. Linked lowstand delta to basin-floor fan deposition, offshore Indonesia: An analog for deep-water reservoir systems. *AAPG Bulletin*, 88, 21–46.
- Séranne, M. and Abeigne, C.-R.N., 1999. Oligocene to Holocene sediment drifts and bottom currents on the slope of Gabon continental margin (West Africa): consequences for sedimentation and southeast Atlantic upwelling. *Sedimentary Geology*, v. 128, 179–199.
- Surlyk, F., Jensen, S.K., Engkilde, M., 2008. Deep channels in the Cenomanian-Danian Chalk Group of the German North Sea sector: Evidence of strong constructional and erosional bottom currents and effect on reservoir quality distribution. *AAPG Bulletin*, v. 92, p. 1565–1586.
- Stevenson, C.J., Jackson, C.A.-L., Hodgson, D.M., Hubbard, S.M., 2015. Deep-water sediment bypass. *Journal of Sedimentary Research* 85, 1058–1081.
- Sylvester, Z., Pirmez, C., Cantelli, A., 2011. A model of submarine channel-levee evolution based on channel trajectories: Implications for stratigraphic architecture. *Marine and Petroleum Geology* 28, p. 716–717.
- Wild, R., Posamentier, H.W., 2012. Seismic stratigraphy and geomorphology of a syn- to post-rift depositional succession, Qiongdongnan Basin, South China Sea. *Search and Discovery Article #10421*.
- Wong, H.K., Lüdmann, T., Baranov, B.V., Karp, B.Ya., Konerding, P., Ion, G., 2003. Bottom current-controlled sedimentation and mass wasting in the northwestern Sea of Okhotsk. *Marine Geology* 201, 287–305.
- Zhan, L., Guo, B., Yu, Y., 2019. Architectural elements and stratigraphy of a deepwater fan: a case study of the Bengal Fan, Rakhine Basin, offshore Myanmar. *Arabian Journal of Geosciences*, 12:212
